# Supplementary material
Source: publisher figshare collection journal article supplement (https://sage.figshare.com/ndownloader/files/12467810)
Supplement: Supplementary file 1 [file 12467810]

Supplement 1. Topics of introductory lectures and scenarios used in the trauma team simulation course during the data collection.

| Timeline    | Topic of introductory lecture            | Scenarios                                                                                                                                                                                                                                                                                                                                                                                                                                                                                                                                                                                                                                                                                                                                                             |
|-------------|------------------------------------------|-----------------------------------------------------------------------------------------------------------------------------------------------------------------------------------------------------------------------------------------------------------------------------------------------------------------------------------------------------------------------------------------------------------------------------------------------------------------------------------------------------------------------------------------------------------------------------------------------------------------------------------------------------------------------------------------------------------------------------------------------------------------------|
| Autumn 2013 | Spinal cord injuries                     | <p>1<sup>st</sup> simulation: A 22-year old male. Fell down from trampoline and after that not able to move. Conscious, drunk. Complains pain in the chest and neck. Nicks in the forehead. Blood pressure (BP) 138/69, heart rate (HR) 73, respiratory frequency (RF) 18, SpO2 96 %, respiratory sounds (RSs) clean and symmetric. Arms numb, legs heavy.</p> <p>2<sup>nd</sup> simulation: A 38-year old male. His car drove off the road (80km/h restrict area) and swung round. Wore no seat belt. Conscious, drunk, don't remember the accident. Left side of the chest is sore, but it is stable. Shinbone complicated fracture in the right. BP 75/55, HR 83, RF 20, SpO2 98 % with oxygen, RSs clean and symmetric.</p>                                       |
| Spring 2014 | Blunt abdominal injuries                 | <p>1<sup>st</sup> simulation: Two cars have crashed. A 25-year old male, who was sitting in the back seat of the car, is conscious, but complains of stomach ache. BP 127/67, HR 89, RF 18, SpO2 98 % with oxygen, RSs clean and symmetric.</p> <p>2<sup>nd</sup> simulation: 40-year male drove a car and crashed with a truck trailer 80km/h. Airbags went off, the seatbelt was on. The car's head is squashed. Patient is conscious, his stomach, pelvis and chest hurts, as well as left hand. BP 132/71, HR 93, RF 20, SpO2 98 % with oxygen, RSs clean, but left side is less audible.</p>                                                                                                                                                                     |
| Autumn 2014 | Damage control in trauma hemorrhage care | <p>1<sup>st</sup> simulation: A 28-year old male jumped from the balcony. Consciousness decreased, GCS = 12. Pharynx tube placed and gags a little. Complicated fractures in the right thigh and both brachiums: bones can be seen. Temperature line in the leg. Instable pelvis. Wound in the chin, some teeth missing. SpO2 98 % with oxygen, rad +, HR 88, RF 16, RSs quiet and symmetric. Pupils are symmetric.</p> <p>2<sup>nd</sup> simulation: A 53-year old male. Fell down with the ultra-light plane and released from the broken-down plane. Been unconscious when found, consciousness now decreased and GCS = 12. Complains pain, disorientated. Chest, both legs and right thigh sore when examined and the fractures can be found in these. Pelvis</p> |

|             |                                                                                                          |                                                                                                                                                                                                                                                                                                                                                                                                                                                                                                                                                                                                                                |
|-------------|----------------------------------------------------------------------------------------------------------|--------------------------------------------------------------------------------------------------------------------------------------------------------------------------------------------------------------------------------------------------------------------------------------------------------------------------------------------------------------------------------------------------------------------------------------------------------------------------------------------------------------------------------------------------------------------------------------------------------------------------------|
|             |                                                                                                          | <p>instable. Burns. Pupils symmetric. BP 82/58, HR 62, RF 26, SpO2 93 % with oxygen. RSs symmetric. Rad +. Temperature line in forearm.</p>                                                                                                                                                                                                                                                                                                                                                                                                                                                                                    |
| Spring 2015 | Neck and thorax injuries                                                                                 | <p>1<sup>st</sup> simulation: A 40-year old male. Run through glass door. Many cuts, cut in the neck is bleeding widely. Conscious, disorientated, drunk. BP 118/69, HR 103, RF 18, SpO2 96 %, RSs clean and symmetric. GCS = 13.</p> <p>2<sup>nd</sup> simulation: A 52-year old male, been in industrial accident, a piece of metal hit the lather operator's chest. Chest aches, clearly labile. No other injuries known. Consciousness reduced, GCS = 12. BP 78/59, HR 103, RF 25, and SpO2 89 %, RS in the right clean, but left side is not audible.</p>                                                                 |
| Autumn 2015 | Crises Resource Management (CRM)                                                                         | <p>1<sup>st</sup> simulation: A 75-year old woman Cycled and fell down as a car pushed her. No primary unconsciousness. Complains of shoulder, side, pelvic and ankle ache on the left. BP 138/53, HR 93, RF 20, SpO2 96 %.</p> <p>2<sup>nd</sup> simulation: A 6-year old boy. The ladders fell over his head. No primary unconsciousness. Wound in the head, crying, eyes deviate to the left. BP 98/60, HR 108, RF 25, SpO2 98 %. GCS = 11.</p>                                                                                                                                                                             |
| Spring 2016 | Trauma care procedures (pelvic stabilization, tensio pneumothorax, thoracocentesis, intraosseous access) | <p>1<sup>st</sup> simulation: A 36-year old male. Stabbed twice: one stab wound in the upper right abdomen (barely bleeds) and another stab wound in the right brachium (oozing). Pale, conscious, drunk. GCS = 14. Rad +. BP 108/66, HR 116, temperature line in wrist. RSs more quiet in the left side. SpO2 94 %, RF 24.</p> <p>2<sup>nd</sup> simulation: A 67-year old male. Fell 4 meters down from the roof to pavement. Shouting and moaning. GCS = 10. Rad +, BP 105/65, HR 98, RF 18, SpO2 92 % with oxygen, Pelvis, abdomen, back and head are sore when examining. RSs symmetric. Temperature line in the leg.</p> |
